# Supplementary material for: Precision engineering for PRRSV resistance in pigs: Macrophages from genome edited pigs lacking CD163 SRCR5 domain are fully resistant to both PRRSV genotypes while maintaining biological function
Source: PubMed Central journal article supplement (PMC5322883; doi:10.1371/journal.ppat.1006206), 2017-02-23
Supplement: ppat.1006206.s010.pdf [file ppat.1006206.s010.pdf]

## Genomic sequence of the CD163 gene locus in large white pigs

Bold and green highlighted exons

sgRNAs and cutting sites are indicated in bold italic

|      |                    |                  |                   |                  |                   |                     |
|------|--------------------|------------------|-------------------|------------------|-------------------|---------------------|
| 1    | TCTTCATCCT         | ATTAGAGACA       | CTGCTATACA        | GCAGAAATTG       | ACACAACATT        | GTAATCAAC           |
| 61   | TATACTTTAA         | TAAAATAAAA       | AAAAGAAATA        | CAAGTGCTTT       | CTACAGACAA        | TCTGCACAAG          |
| 121  | TTATTTGTTA         | GACATATTTG       | ATTATAGAAT        | TAATATTAAA       | AGGGGTATA         | ACAATCAAGC          |
| 181  | ATTGATAATT         | TAATTATGTT       | TGCCTATTTT        | ACTTTAGTTT       | TTTGACATAA        | CTGTGTAAC           |
| 241  | ATTGCGATTT         | TTTTATTCCT       | AATGTAATTA        | GTTCAAAACA       | AAGTGCAGAA        | ATTTAAAATA          |
| 301  | TTCAATTCAA         | CAACAGTATA       | TAAGTCAATA        | TTCCCCCTT        | AAATTTTAC         | AAATCTTTAG          |
| 361  | GGAGTGTTTC         | TCAATTTCTC       | AATTTCTTTG        | GTTGTTTCAT       | GTCCCATATG        | GAAGAAAACA          |
| 421  | TGGGTGTGAA         | AGGGAAGCTT       | ACTCTTTTGA        | TTACTTCCCT       | TTTCTGGTTG        | ACTCCACCTC          |
| 481  | CATTATGAAG         | CCTTTCTGTA       | TTTTTGTGGA        | AGTGAAATGA       | TTTTTAGAAT        | TCTTAGTGGT          |
| 541  | TCTCTTCTTC         | AGGAGAACAT       | TTCTAGGTAA        | TAATACAAGA       | AGATTTAAAT        | GGCATAAAAC          |
| 601  | CTTGGA <b>ATGG</b> | <b>ACAACTCAG</b> | <b>AATGGTGCTA</b> | <b>CATGAAACT</b> | <b>CTGGATCTGC</b> | <b>AG</b> GTAAAAATC |
|      | <b>Exon 1</b>      |                  |                   |                  |                   |                     |
| 661  | TTCTCATTTA         | TTCTATATTT       | ACCTTTTAAT        | AGAGTGTAGC       | AATATTCCGA        | CAGTCAATCA          |
| 721  | ATCTGATTTA         | ATAGTGATTG       | GCATCTGGAG        | AAGAAGTAAC       | AGGGAAAAGG        | CAATAAGCTT          |
| 781  | ATAAGGGGAA         | CTTTTATCTT       | CCATAGAATC        | AAAATTGAAG       | ACGTGACTAG        | AAGAAGGATT          |
| 841  | AGATTTGGCA         | TCAGTTTTGT       | AAAATTGCTG        | AGGTGAAATT       | AAGTAAGGGA        | TGAAAATTAA          |
| 901  | CTAAATTGTG         | TTGAGTATGA       | AACTAGTAGT        | TGTTAGAAAA       | GATAGAACAT        | GAAGGAATGA          |
| 961  | ATATTGATTG         | AAAGTTGATG       | ACCTAGAGGA        | CATTTAGACT       | AACACCTCTG        | AGTGTCAAAG          |
| 1021 | TCTAATTTAT         | GATTTACATC       | GATGCGTTAA        | ACTCATTTAA       | CATTCTTACT        | TTTTTCCCCT          |
| 1081 | CAAGCATTTA         | AGCTGAAGTA       | TAACATTTCA        | CATGAAAGCC       | TGGATTATAA        | ATGCACAGTT          |
| 1141 | CAGTGACCTA         | TCTCAGAGGA       | GTGACTGCCA        | TAGCATTTTT       | TTTGTCTTTT        | TGCCTTCAGA          |
| 1201 | GCCACAGCAA         | CGCGGGATCC       | GAAGCCGCGT        | CTGCGACCCA       | CACCACAGCT        | CACGGCAATG          |
| 1261 | CCGGATCTTT         | AACCCACTGA       | GCGAGGCCGG        | GGATCGAACC       | CGCAGTCTCA        | TGGTTCCTAG          |
| 1321 | TAGGATTCGT         | TAACCACTGC       | GCCACGACGG        | GAACTCCTAC       | CATAGCATTT        | TTACTTTTTAA         |
| 1381 | GTTACTGTTG         | GTTTAGAGTA       | AGAAGGAGAA        | ATGAGAGTGA       | TGGAGCGTTT        | GCTATATTTG          |
| 1441 | GAGACAAGGT         | CCTATATTGG       | AGGTTCTCAA        | ATATAAATTT       | TGTCGCTTTT        | TCCTCCAATG          |
| 1501 | TATTGTTCAA         | CTACTATTTA       | GCAGGCCACT        | GTGCCAGGTA       | CTGGTGAAAC        | TGGTGAACAT          |
| 1561 | GATAGATGTA         | ATTCATTCCC       | TCATGGAAC         | TTCCATCTAA       | CAATGTGGAT        | CAGGTAGGCT          |
| 1621 | TGGAGATGAG         | AATGCCAGTG       | GTTGACTATG        | ACTCTGTGGC       | TGAAGGGAGA        | GCTACTCACT          |
| 1681 | TCGTAGTTTC         | ATCAATGTCT       | TTTTGGTTTT        | CCAGGTTTTA       | AGCCCTGCTC        | TTGCAATTCT          |
| 1741 | TTTCCCTTCT         | CCAACCTTCT       | TCTAATTTCT        | CACCCCTAGG       | ATGCCTATAA        | ACATGAGTAT          |

|      |               |            |             |             |            |             |
|------|---------------|------------|-------------|-------------|------------|-------------|
| 1801 | TTTCAAAGCT    | ACTTCACTGA | GGTTATATGA  | TCCTCGTGTG  | AATTTTTCTT | GCCTGCCTTG  |
| 1861 | CCATTTAGAA    | GGAAGTGTTT | CCTGGAATTT  | CCATTGTGGC  | TTGGTGGTTA | AAGACCCTGC  |
| 1921 | ATTGTCTCTG    | TGAGGATGTG | GGTTCAATCT  | CTGGCCTCAT  | TCAGTGAGTG | GGTTAAGGAT  |
| 1981 | CTGGTGTGCG    | TGCAAGCTGT | GGCTAAGATC  | CCACATTGCC  | ATGGCTGTGG | TGTAGACTGG  |
| 2041 | CACCTGGAGC    | TCTGATTTGA | CCACAATCCT  | AGGAACTTCA  | GATGTTGCCA | TAAAAAGAAA  |
| 2101 | AAAAAAGTTA    | GGAAGGGTTT | TCTGTCTTGT  | TTGACCTTT   | GTTAATCTCA | AACCTTTGGA  |
| 2161 | ACCATCTCTC    | CTCCAAAACC | TCCTTTGGGT  | AAGACTGTAT  | GTTTGCCTTC | TCTCTTCTTT  |
| 2221 | TCGCAGACTT    | TAGAAGATGT | TCTGCCCATT  | TAAGTTCCTT  | CACTTTTGCT | GTAGTCGCTG  |
|      | <b>Exon 2</b> |            |             |             |            |             |
| 2281 | TTCTCAGTGC    | CTGCTTGGTC | ACTAGTTCTC  | TTGGTGAGTA  | CTTTGACAAA | TTTACTTGTA  |
| 2341 | ACCTAGCCCA    | CTGTGACAAG | AAACACTGAA  | AAGCAAATAA  | TTCTCCTGAA | GTCTAGATAG  |
| 2401 | CATCTAAAAA    | CATGCTTCAT | GGTTTCAAAG  | GATCAGATAT  | TAAAAACCCC | AAATAGGTAC  |
| 2461 | AGAACCATGT    | GGCTCTCTCC | CCCCAAACAA  | ATAAACGTT   | AGCATGGTTT | TCAAAAAAAT  |
| 2521 | AAAATAACCT    | TCACAGGAAA | AATGGATTTT  | ACTTAAGATT  | TGAAATAATA | TCTAACTAAA  |
| 2581 | AAATAGGGAA    | TAATGCAGAA | GAGGAGAAAC  | CTCAGAATTG  | TTGGGATGAA | GGAATTTTTTA |
| 2641 | GTAACACTAA    | AAATTCAAGT | GCCAAAATTT  | GTCTAAAATT  | GTATTCAGGG | AAGCCAGATA  |
| 2701 | TATATCAGTG    | AAATCGCCAG | TTCCTATATT  | AGCTAAAATA  | ATCACAAGGC | TGTAGCAGAG  |
| 2761 | ACAGTTCAGA    | GAGAGGTGGA | GATGAGATTT  | TTTTTTTTTA  | AGTATAATTG | ATTTACAATG  |
| 2821 | TTGTGGCAAT    | TTCTGTTGTA | TAGCAAGAGA  | TAGAATTATT  | TTATGGTGGG | AGATAATAGA  |
| 2881 | AAAATATATC    | CATATCAATT | TCCATTTGAG  | TAGATAAATT  | TCAATTAGAG | TTCAACTAGC  |
| 2941 | AATTAGTAGT    | TTTGATACA  | TGGTGAAAATA | TATTCATGGT  | ATTTTGCATA | TATGTGTGAA  |
| 3001 | ATAGGTAATA    | AATTCCTCAT | AACTGTTCTT  | TTTAGTCTCA  | CCATCAGCCT | CTACTGATCT  |
| 3061 | TAGGATTTTG    | GAGAAACATA | CATAGTTCAT  | CCCTATAAAA  | TGCCATAAAA | TCTCATTTTT  |
| 3121 | ACATTAAACC    | ATCCAAGAGA | TTATATAAAT  | TGACCTTATA  | AAGAATATCA | GCCATAAAAT  |
| 3181 | AAAGGTATCA    | TAGTATGGGA | TTATTTAGCT  | TTATTGGTTC  | TATGTCACTG | CTTAATTTGA  |
| 3241 | AACCTGTGAT    | ATTGCTGTTT | GTTTTTGAAC  | TCCTATGAAA  | TAACATTCTC | CCATTGTACC  |
| 3301 | ATGGATGGGT    | CCAGAAACAT | TTCTCAAATC  | TGGCTTTGAA  | AAATAAATAA | GTAATCTAAA  |
| 3361 | GAATAATAAT    | TCTCTACTTG | CTCTTTGAAT  | CTTGACCAAT  | TGCTGCATTT | ACCTATTGTT  |
| 3421 | ACAGGAGGAA    | AAGACAAGGA | GCTGAGGCTA  | ACGGGTGGTG  | AAAACAAGTG | CTCTGGAAGA  |
|      | <b>Exon 3</b> |            |             |             |            |             |
| 3481 | GTGGAGGTGA    | AAGTGCAGGA | GGAGTGGGGA  | ACTGTGTGTA  | ATAATGGCTG | GGACATGGAT  |
| 3541 | GTGGTCTCTG    | TTGTTTGTAG | GCAGCTGGGA  | TGTCCAAC TG | CTATCAAAGC | CACTGGATGG  |
| 3601 | GCTAATTTTA    | GTGCAGGTTT | TGGACGCATT  | TGGATGGATC  | ATGTTTCTTG | TCGAGGGAAT  |
| 3661 | GAGTCAGCTC    | TCTGGGACTG | CAAACATGAT  | GGATGGGGAA  | AGCATAACTG | TACTCACCAA  |
| 3721 | CAGGATGCTG    | GAGTAACCTG | CTCAGGTAAG  | ACATACACAA  | ATAAGTCAAG | CCTATACATG  |
| 3781 | AAATGCTTTG    | TGGGAAAAAA | TGTATAGATG  | AGTTAAAAAC  | AAAAAGGAAC | CAGTTTTTCTA |

|      |            |             |             |                 |             |             |
|------|------------|-------------|-------------|-----------------|-------------|-------------|
| 3841 | TAAGTCATCT | AGTCCATGTA  | TAAAATTACC  | CAATCCATTA      | CTAAAAGACC  | ACTTCTGGTA  |
| 3901 | TTTTACACAT | GACAAAGCCC  | ATATTA AAAA | AAAAAAATTC      | AGAAGAGATT  | CTGAATGCTA  |
| 3961 | TAATAAATGA | GCAAGT GACT | AGCTTCAATT  | TTATATTAGG      | TCATTCTACC  | TTCTACTTCT  |
| 4021 | ACATGAAAAT | ATCATAATGT  | CTAAGTTAAT  | TCCTTG TCCC     | CTTTCCCAAT  | AAAGCACTGC  |
| 4081 | TTTCATGCAC | TGGCCTATGA  | ATCATGAACT  | TTTTG C C C T T | TA ACTGATGA | TCAACTTACC  |
| 4141 | AAATCAAGAA | ATAAATATTC  | TTAGCACTGA  | TCCTTTTTTG      | TTGTTGTTGG  | AGGAAGAATG  |
| 4201 | TTTTGCAAAG | TAGAATTGCT  | TTTTTCTGTT  | TAACAGTGCT      | ATTCATTTCA  | TTTACATGGT  |
| 4261 | CGTTTTAATT | TATAAAACAT  | TTCATAAGTT  | TCACCTCATA      | TGCCCTTACA  | ATAACTCAGG  |
| 4321 | AAGTTATATG | TTAGACCTTT  | CTGCTGACAA  | ATCCCAGAGT      | CATGTTTCTG  | ACCCAGTTCA  |
| 4381 | GATTCCTTGG | CTTCCCATTT  | CTCTTTGCTC  | ATGTCATTGA      | CCTTTATGCA  | GCCCTCTTAC  |
| 4441 | CTCCCACCTT | TCTATTACAG  | ACCATCTCCT  | CCATAGGACT      | GGTGTTAGAA  | AGTACTAATC  |
| 4501 | TCTACCCAGG | CATTGTGGTG  | CAATGTGGGC  | AGCACAGGCT      | GGTATCTAGA  | AAAATGCTGA  |
| 4561 | AGTGAATTCC | AGCTCAGCTG  | CTCGTTAATA  | CTATTGTTTT      | AAGTAAGCTG  | TTCAATCCTT  |
| 4621 | TGAAATTCAC | TTTCTGAGCA  | CTCAGTGATA  | TAATAAATGT      | AGAGTTACTG  | GTACACTGTC  |
| 4681 | TGGTATGTAA | TAGGTGTTAA  | AAATTAACCT  | TAGTTTCCTC      | ATGGGTCACT  | GCTTCTCATT  |
| 4741 | ACCTAGACAA | CTCATTTCTC  | TTTCTTCCTC  | TTTCTCTTTC      | TCCATTCTCC  | TCCTCCTTCT  |
| 4801 | TCCTCTTCTT | CTTGTCTTTT  | ATTGTTATTC  | ATTTTGCTGA      | GAAAGTTAAG  | AAATAACAAC  |
| 4861 | TCTAACCTCT | ACATCGACCA  | CCTAGAGCAA  | AGTTAAAAAT      | AATAATAAAC  | CTTGCCAGAC  |
| 4921 | TCTTACTATA | ATTGTTGCTG  | TCTATAGAGT  | TGACTGTTTTA     | AGTTAAGACA  | TCAGTATAGT  |
| 4981 | ATTTTTAATT | TTTGTGTTTT  | TTTTTTCATA  | CTTTTACATG      | AGGATCCTTT  | ATATAAGGAT  |
| 5041 | GAGTTAAACA | AACTTGATTT  | TTGAAGTTTA  | TACCCCTGAG      | GCTCAACTGC  | ATAATAATAG  |
| 5101 | AAAGGGATCC | ATAGCCTCTC  | AAGGACTTAA  | CTAGTTTCAT      | GAGTTTTCAG  | AATCTGAATT  |
| 5161 | TCTGAGATTC | TCCACCCCAA  | TTAAAGCTCA  | AGCCTCAGAA      | CATATATCCT  | TCTCTTGGTA  |
| 5221 | AATTCTATTC | TTATCACATG  | CGTAATAATA  | AAAAAGAGAG      | ATGTTGGAGA  | CAGATTTTTT  |
| 5281 | TCCTCACATT | CTGTCTCTAC  | TGTTTTCTAG  | GTGTTTGATT      | CTGTGTTATT  | TAACCTCAGT  |
| 5341 | TTGCTTATCT | GTGAAGTAGG  | GATTATGGTA  | ATAACATATA      | ATGCTTAATG  | TTGTAAAGAC  |
| 5401 | TAAAGAAGAT | AGCATATGTA  | ACACATTTGG  | AACAGGGAAT      | GCATATTTTG  | ATTGTGAGCT  |
| 5461 | CTTATTATTA | TTACCAATCA  | GCCATAATAA  | AAATCTTGTT      | AAGTGGAGGT  | CTTTGGATTT  |
| 5521 | CAGAGCTTTT | AAAATCTAAT  | TACTTTTTCA  | AAAAAGAGCT      | TCTTAGTGTT  | TTTTTTTTTT  |
| 5581 | AACCACAAAG | TGTTTCTATT  | TTTTAGGTGT  | CCCAAATTT       | CATTCCAAAT  | ATCTTTTTTCT |
| 5641 | CAGATATTTT | AGTCCTCATA  | GAACACCTAG  | GGATAGTGTA      | TAGAGAAAAT  | TTCTTTTATT  |
| 5701 | AAAAAGCTGT | TCTTTGCTAA  | AAATTGTAGC  | AGGTACTTTT      | GGGAGGGGGG  | AAAACTTTGA  |
| 5761 | TTCAGAACT  | GCTAAGACAT  | GGAGTGTTTT  | GACTAATTTT      | TCCTCAATTT  | TTAATGTTTT  |
| 5821 | TTATACCATA | GGGTACTTTT  | GCAAAC TATT | ATGCATACTT      | ATATATTTTT  | ACTTTTTTCC  |

|      |                   |                   |                    |                   |                    |                   |
|------|-------------------|-------------------|--------------------|-------------------|--------------------|-------------------|
| 5881 | TGTCTTTTAA        | CTTCCAAATT        | CAACTTCAGA         | CAATTATTCA        | TGCACTAAAC         | TGTTGTAGTA        |
| 5941 | AGAAAAGATTA       | AAATTAATAA        | ATTAACCATT         | CAACAAATGA        | CTGGTTTGCC         | ATTTTTACTA        |
| 6001 | CTTTGTTGTA        | TGAACAATTT        | TTTTTTCTAC         | AAATGAATAC        | TTTGAGTCTG         | ATTTATCCAT        |
| 6061 | TCCTACATAA        | AAGTTTTTAC        | TATATCTTAG         | TATTGGAAGG        | AAACAAAACA         | AAACACAATG        |
| 6121 | TAAATTTTAA        | TCTATAAATT        | TTGGGGGGGG         | GTAAATATAC        | ATAGATGAAA         | GTCTTAACCA        |
| 6181 | TTAATTAGAG        | TCAAAAGATT        | AAAATTCTCC         | AATATGTGAA        | CTTAGGCTGC         | ATCCAAAATG        |
| 6241 | AAGCATCATT        | TTTAAGGACA        | GCATCAAAAAG        | TGACCAGAGG        | AATTTTACTT         | TCTTTCTTTT        |
| 6301 | TTTTTTTTTT        | TTTGAATTTT        | AGTTTCTAAA         | CTCACTTCTG        | AATAAATACA         | ACTTCTAAAT        |
| 6361 | TCTCGTCTTT        | TCTCTACTCT        | AG <b>ATGGATCT</b> | <b>GATTTAGAGA</b> | <b>TGAGGCTGGT</b>  | <b>GAATGGAGGA</b> |
|      |                   |                   | <b>Exon 4</b>      |                   |                    |                   |
| 6421 | <b>AACCGGTGCT</b> | <b>TAGGAAGAAT</b> | <b>AGAAGTCAA</b>   | <b>TTTCAAGGAC</b> | <b>GGTGGGGAAC</b>  | <b>AGTGTGTGAT</b> |
| 6481 | <b>GATAACTTCA</b> | <b>ACATAAATCA</b> | <b>TGCTTCTGTG</b>  | <b>GTTTGTAAC</b>  | <b>AACTTGAATG</b>  | <b>TGGAAGTGCT</b> |
| 6541 | <b>GTCAGTTTCT</b> | <b>CTGGTTCAGC</b> | <b>TAATTTTGA</b>   | <b>GAAGGTTCTG</b> | <b>GACCAATCTG</b>  | <b>GTTTGATGAT</b> |
| 6601 | <b>CTTGTATGCA</b> | <b>ATGGAAATGA</b> | <b>GTCAGCTCTC</b>  | <b>TGGAACTGCA</b> | <b>AACATGAAGG</b>  | <b>ATGGGGAAAG</b> |
| 6661 | <b>CACAATTGCG</b> | <b>ATCATGCTGA</b> | <b>GGATGCTGGA</b>  | <b>GTGATTTGCT</b> | <b>TAA</b> GTAAGGA | CTGACCTGGG        |
| 6721 | TTTGTCTGT         | TCTCCATGAG        | AGGGCAAAAA         | AAGGGGAGTA        | AAAGTCTTAA         | AAGCTCAAAC        |
| 6781 | TGTTAAAAAC        | ATAATGATGA        | TTGCTTCTTT         | TATCATCTTA        | TTATTATCTA         | ATTTCAGGTC        |
| 6841 | GAAATCTAG         | TACCTGTGCA        | GTTTTTTACC         | TTAACTGAAA        | TTAAGATAAA         | TAGGATAGGG        |
| 6901 | AGGAAGGATG        | AGCAGTGACA        | TTTAGGTCCA         | AGTCATGAGG        | TTAGAAGGAA         | ATGTTCAGAG        |
| 6961 | AATAGCCCAT        | TCCCTCAGCC        | CTCAAAGAAA         | GAAAGAAAGA        | AAAAGAAAAA         | AAAAAAGAAA        |
| 7021 | GCTTAACTAG        | AAAATTTTGT        | TCTCTGGATG         | TTTTAGAGGC        | AAACCATCCC         | TTTTATCATT        |
| 7081 | CCTTACCTAC        | AAAGCCCTTC        | TCTTTAATCA         | CATTGACCCA        | CCCTTTCCTA         | AACTATTAGT        |
| 7141 | TCAAATTCAC        | ATAATTGAAT        | GCTTTTAAAA         | CTTGGTTTCC        | TCTTATAAAT         | ATATTTATGT        |
| 7201 | TGTAAGGAGG        | CACTGTGTCT        | TGTCTAGAGA         | CTTTCATGTT        | CTATGCTTGA         | TTATGGGACA        |
| 7261 | GGGACATGGC        | TTTGTCTGCT        | CCAGGATGTC         | ACTCTCCTTT        | TTTCACTTGA         | GCTCCTAGTT        |
| 7321 | TGAAGAAGAC        | CTAGTAAGTC        | TTGAACTCCA         | GGGAGTCTTT        | AGGAAACTAT         | CCCTAGAGCA        |
| 7381 | AAACTGTCCC        | TGAATTCACC        | CAGTGTCTTT         | TTTTTTTTTT        | TCAAATGAAG         | GAACTTTAGT        |
| 7441 | TCAAATAAAA        | TTTAAAATAA        | GGGAATTCTA         | ATTCAGAATA        | CTGGGAAATC         | CAGGAGATTA        |
| 7501 | CAATTGGCTT        | CATGTGTGAT        | TGGATTCAGC         | ACTTCACCAA        | TGTCATCAGG         | GTTCTGGTTC        |
| 7561 | TTTTTTTATT        | TCTTGAATTG        | GCTTTTTTTT         | TTTTTTCCTT        | GTTGAACAAT         | ATGACTATCT        |
| 7621 | ATACTTTGAA        | CCACAAAGAA        | AGTGATTCCCT        | ACAGAAAAGA        | CAGAATGTGT         | TAGCTGAAGG        |
| 7681 | AAGGGAATGG        | GACTTGGGGT        | AGAAAAA AAC        | ACCTTCCGTA        | TTCCTTAACC         | TATCAAAAAT        |
| 7741 | TTCTAGGTAC        | CCCTAACTAA        | AATCCTAATT         | CAAGCATATT        | GGAGGAACTT         | GACAAATCCA        |
| 7801 | GGAATAATAT        | TATCCGTTAT        | CAAATACATG         | CACATCATTT        | ACATTTCTCC         | ATGTCTCTGC        |
| 7861 | TCATGCAGTT        | CCCGGCCCTA        | ACTCTACCAA         | AGTATTACTC        | TCCATCTCCC         | TCTTTTTTTT        |

|      |                    |                                                                |                   |                   |                   |                   |
|------|--------------------|----------------------------------------------------------------|-------------------|-------------------|-------------------|-------------------|
| 7921 | TTTAATGATT         | TTTATTTTTT                                                     | CTGTTATGAC        | TGGTTTACAG        | TGTTCTGTCA        | ATTTTCTACT        |
| 7981 | GTACAGCAAA         | GTGACCCAGT                                                     | CACACATTCA        | TATATACATT        | CTTTTTCTCA        | CATTATCCTC        |
| 8041 | CATCAGGCTC         | CATCACAAGT                                                     | GACTAGACAT        | AGTCCCAGA         | GCTATGCAGC        | AGGATCTCAT        |
| 8101 | TGCTGCTCCA         | TTCCAAAGGC                                                     | AACAGTTCAC        | ATCTATTAAC        | CCCAGATTCC        | CAGTCCACCC        |
| 8161 | CACTCCCTTC         | CCCTCCCTCT                                                     | TGGCAACCAC        | AAGTCTGTTC        | TCCAAGTTCA        | TGAGTTTATT        |
| 8221 | TTCTGTGGAA         | AGTTTTATTT                                                     | GTGCAGTATG        | TTAGATTCCA        | GATATAAGTG        | CTATCATATG        |
| 8281 | GTATTTGTCC         | TTCTCTTTCT                                                     | GACTGACTTC        | ACAAAGTATG        | AGAGTCTCTA        | GTTCCATCCA        |
| 8341 | TGTTACTGCA         | AATGGCATT                                                      | TTAATCTCCA        | TCTTTTTTTG        | TTCATGTATA        | TGTTACCCAG        |
| 8401 | ATTCCTTGAC         | TTTTCTACAT                                                     | CATCAAGATA        | TTGTTGATCA        | CTTCTTTGTA        | GTGATTTCTG        |
| 8461 | CCTTTCTCTG         | ATGTCCTGTG                                                     | ACACTAGTCT        | GGATTATTCA        | TTTACCTGAA        | ACCACATGTC        |
| 8521 | TCTTATAATG         | TGTATCCCAA                                                     | ATTAAATATG        | TCTATTGTAA        | TGTGTATCCC        | AAATTAAATA        |
| 8581 | TTTATCTTTC         | TAAAAAAAAA                                                     | AATTTCTAGG        | CCCCAATCA         | GCATGTTTCT        | TCTCAGTGTG        |
| 8641 | TTTTATACAT         | GCTGCAGAAT                                                     | CATAATAGAC        | AGCATAATAG        | ACAGCATAAC        | AAAAACTAAA        |
| 8701 | AATGCCAGGG         | GAAAAAAGCA                                                     | ATTTACTGAT        | TACAACATAT        | TACTCAGAAT        | CAAGTTCTGT        |
| 8761 | TCTTTGAGGA         | ATATTGATTG                                                     | GGGGAAAATG        | AAAATAATGA        | TGGGGAGGTC        | CCTTTTCTCT        |
| 8821 | TTGCTTTGCT         | TTTAAACTAC                                                     | GGAAAGTAGC        | AGAAAGGGGT        | CAGGAATGTA        | ATATAAACCA        |
| 8881 | GGTAGTCCTG         | GTAGGTAACG                                                     | CAGCCGGAGG        | CAAAGTGAG         | TGTTGAGTAT        | TGAGGCAAAC        |
| 8941 | TGGAGGGCAT         | GGATACCACC                                                     | TAGACAGATG        | CAAATATATA        | TTTAACAGGG        | AAAAAAGAAC        |
| 9001 | CAAACAATTT         | CAACAAAAAA                                                     | CCAAACAATT        | CCAACAAAAT        | TGGTCCAATA        | AGCAAACCTC        |
| 9061 | TAGATAAATT         | TCAGTCCCTG                                                     | GATGTTTTGT        | TAGGAATCT         | TCCTACAATG        | CGTGCTTTCC        |
| 9121 | ATTCTGAAAA         | GTCCTATCTA                                                     | CTTGCTGAT         | CCACTTCTCC        | TTCCATCCTA        | AACGATTTTC        |
| 9181 | AGTGGTAGTA         | TATTACTGTT                                                     | GTCTCTGTCT        | CTACTTATAT        | ATCTTCCCCT        | TTTCACTCAC        |
| 9241 | TCCTCTCAGG         | TACAGCTCTT                                                     | CAGTTTGCCC        | TTATTCTTGT        | TTCTTGTCA         | ATGACTTGTT        |
| 9301 | TTGTGTCCCT         | CTTACAG <b>ATG GAGCAGACCT GAAACTGAGA GTGGTAGATG GAGTCACTGA</b> |                   |                   |                   |                   |
|      |                    | <b>Exon 5</b>                                                  |                   |                   |                   |                   |
| 9361 | <b>ATGTTTCAGGA</b> | <b>AGATTGGAAG</b>                                              | <b>TGAAATTCCA</b> | <b>AGGAGAATGG</b> | <b>GGAACAATCT</b> | <b>GTGATGATGG</b> |
| 9421 | <b>CTGGGATAGT</b>  | <b>GATGATGCCG</b>                                              | <b>CTGTGGCATG</b> | <b>TAAGCAACTG</b> | <b>GGATGTCCAA</b> | <b>CTGCTGTCAC</b> |
| 9481 | <b>TGCCATTGGT</b>  | <b>CGAGTTAACG</b>                                              | <b>CCAGTGAGGG</b> | <b>AACTGGACAC</b> | <b>ATTTGGCTTG</b> | <b>ACAGTGTTC</b>  |
| 9541 | <b>TTGCCATGGA</b>  | <b>CACGAGTCTG</b>                                              | <b>CTCTCTGGCA</b> | <b>GTGTAGACAC</b> | <b>CATGAATGGG</b> | <b>GAAAGCATT</b>  |
| 9601 | <b>TTGCAATCAT</b>  | <b>AATGAAGATG</b>                                              | <b>CTGGTGTGAC</b> | <b>ATGTTCTG</b>   | GT AAGTGAAAAC     | AAAACACCGG        |
| 9661 | AAGGACCTGT         | GTTCTTCAGG                                                     | ATTAGGAATG        | GATATGAGAT        | AGGAGAAAAA        | TTGTATCTAA        |
| 9721 | TATTTTCTTT         | GTTGGGAATT                                                     | CTTTTACAGT        | TGTGACAAAT        | CTTTAACATA        | TTCTTCATTT        |
| 9781 | GAGTAGTTTG         | GAGGGTTGTC                                                     | TGACTGTTTT        | CTATAATAAA        | TGTCCCAAGT        | GCTATGAGGT        |
| 9841 | ACCACATTTT         | AAATTCTAAT                                                     | TCTACCTGAA        | GCTCCAAAAA        | GACAAAATGT        | TATAGGTCTT        |
| 9901 | TTCTTTATAT         | CTAATTTGCT                                                     | TATGGTTTTT        | AGCCATTGAC        | AATTTTTTTT        | TTCTTAACTC        |

|       |                   |                   |                   |                   |                   |                    |            |
|-------|-------------------|-------------------|-------------------|-------------------|-------------------|--------------------|------------|
| 9961  | TTGAAACTAT        | AATCCTATTT        | CTAACCAAAT        | TCATGTTCTA        | TACTGGCTCT        | TCAAAAACCC         |            |
| 10021 | AGGAGATGGG        | AAAGCCAGAA        | TCTCCAGTGT        | TTCAGCTTCT        | GGGAAGGAGC        | AAGTTTTTAA         |            |
| 10081 | ATGTGGGAGC        | TAAATTCCAC        | ATGTATCTAT        | GGCCTAAGTG        | TATGTTTATT        | TTGCAG <b>ATGG</b> |            |
| 10141 | <b>ATCAGATCTG</b> | <b>GAAGTGAAGC</b> | <b>TTAAAGGTGG</b> | <b>AGGCAGCCAC</b> | <b>TGTGCTGGGA</b> | <b>CAGTGGAGGT</b>  |            |
|       | <b>Exon 6</b>     |                   |                   |                   |                   |                    |            |
| 10201 | <b>GGAAATTCAG</b> | <b>AAACTGGTAG</b> | <b>GAAAAGTGTG</b> | <b>TGATAGAAGC</b> | <b>TGGGGACTGA</b> | <b>AAGAAGCTGA</b>  |            |
| 10261 | <b>TGTGGTTTGC</b> | <b>AGGCAGCTGG</b> | <b>GATGTGGATC</b> | <b>TGCACTCAA</b>  | <b>ACATCATATC</b> | <b>AAGTTTATTC</b>  |            |
| 10321 | <b>CAAACCAAG</b>  | <b>GCAACAAACA</b> | <b>CATGGCTGTT</b> | <b>TGTAAGCAGC</b> | <b>TGTAATGGAA</b> | <b>ATGAAACTTC</b>  |            |
| 10381 | <b>TCTTTGGGAC</b> | <b>TGCAAGAATT</b> | <b>GGCAGTGGGG</b> | <b>TGGACTTAGT</b> | <b>TGTGATCACT</b> | <b>ATGACGAAGC</b>  |            |
| 10441 | <b>CAAATAC</b>    | <b>TGCTCAG</b>    | GTA               | AGAATTTCAA        | TCAATGTGTT        | AGGAAATTGC         | ATTCTACTTT |
| 10501 | CTTTTACATG        | TAGCTGTCCA        | GTTTTCCCAG        | CACCACTTGT        | TGAAGAGACT        | GTCTTTTCTT         |            |
| 10561 | CATCATATAG        | TCCTACATCC        | TTTGTCCATAA       | ATTAATTGAC        | CATAGGTGTG        | TGGGTTTATA         |            |
| 10621 | TCTGGGCTCT        | CTATTCTGTT        | CCTTTGATCT        | ATGTGTCTGT        | TTTTATGCCA        | GCACCATGCT         |            |
| 10681 | GTTTTGATTA        | CTATAGCTTT        | GTAGTATCAT        | CTGAAGTCAG        | GAAACATGAT        | TCCTCCAGCT         |            |
| 10741 | TTGTTCTTCT        | TTCTCAAGAT        | TGTTTTGTCT        | ATTCAGAGTT        | TTATGTTCCCT       | ATGCAGATTT         |            |
| 10801 | TATTTTTATT        | TTTATTTTAT        | TTTTATTTTT        | TTTATTTTCC        | CACTGTACGG        | CAAGGGGGTC         |            |
| 10861 | AGGTTATCCT        | TACATGTATA        | CATTACAATT        | ACAGTTTTTC        | CCCCACCCTT        | TCTTCTGTTG         |            |
| 10921 | CAACATGAGT        | ATCTAGACAA        | AGTTCTCAAT        | GCTATTCAGC        | AGGATCTCCT        | TGTAAATCTA         |            |
| 10981 | TTCTAAGTTG        | TGTCTGATAA        | GCCCAAGCTC        | CCGATCCCTC        | CCACTCCCTC        | CCCCTCCCAT         |            |
| 11041 | CAGGCAGCCA        | CAAGTCTCTT        | CTCCAAGTCC        | ATGATTTTCT        | TTTCTGAGGA        | GATGTTCAAT         |            |
| 11101 | TGTGCTGGAT        | ATTAGATTCC        | AGTTATAAAG        | GATATCATAT        | GGTATTTGTC        | TTTGTCTTTC         |            |
| 11161 | TGGCTCATT         | CACTCAGGAT        | GAGATTCTCT        | AGTTCCATCC        | ATGTTGCTGC        | AAATGGCATT         |            |
| 11221 | ATGTCATTCT        | TTTTTATGGC        | TGAGTAGTAT        | TCCATTGTGT        | ATATATACCA        | CCTCTTCTGA         |            |
| 11281 | ATCCAATCCT        | CTGTCGATGG        | ACATTTGGGT        | TGTTTCCATG        | TCCTGGCTAT        | TGTGAATAGT         |            |
| 11341 | GCTGCAATGA        | ACATGCGGGT        | GCACGTGTCT        | CTTTTAAGTA        | GAGCTTTGTC        | CGGATAGATG         |            |
| 11401 | CCCAAGAGTG        | GGATTGCAGG        | GTCATATGGA        | AGTTCTATGT        | ATAGATTTCT        | AAGGTATCTC         |            |
| 11461 | CAAAGTGTCC        | TCCATAGTGG        | CTGTACCAGT        | TTACATTCCC        | AGCAGCAGTG        | CAGGAGGGTT         |            |
| 11521 | CCCTTTTCTC        | CACAGCCCCT        | CCAGCACTTG        | TTATTTGTGG        | ATTTATTAAT        | GATGGCCATT         |            |
| 11581 | CTGACTGGTG        | TGAGGTGGTA        | TCTCATGGTA        | GTTTTGATTT        | GCATTTCTCT        | TATAATCAGC         |            |
| 11641 | GATGTTGAGC        | ATTTTTTCAT        | GTGTTTGTCTG       | GCCATCTGTG        | TATCTTCTTT        | GGAGAAATGT         |            |
| 11701 | CTATTCAGGT        | CTTTTGCCCA        | TTTTTCCATT        | GATTGATTGT        | TTTTTTTGCT        | GTTGAGTTGT         |            |
| 11761 | ATAAGTTGCT        | TATATATTCT        | AGAGATTAAG        | CCCTTGTCAG        | TTGCACCTAT        | GCAGATTTTA         |            |
| 11821 | AAACTATTTT        | CTCTAGTTCT        | ATGAAAAATA        | CCATTGGTAA        | TTTGATAGGG        | ATTGCCCTGA         |            |
| 11881 | ATCTGTAGAT        | TGCCTTGGAT        | AGTATTGCCA        | TTTTAACAAT        | ACTGAATCTT        | CCAATTCGAG         |            |
| 11941 | AGCACAGTGT        | ATCTTTCTTT        | CTGTGTCATC        | TTCAGTTCTT        | CTCATCTGCA        | TCTTATAGTT         |            |

|       |             |            |            |             |            |            |
|-------|-------------|------------|------------|-------------|------------|------------|
| 12001 | TTAGAAGTAC  | AGGTCTTTTG | CCTCCTAAGG | TGGGTTTTTTT | CCTAGGCATT | TTATTCTTTT |
| 12061 | CAATGTGATA  | GTGAATGAAA | TTGTTTCCTT | AATTCTTTCT  | CTCTCTTTTT | TAATGGCTTC |
| 12121 | ACCTGCAGCA  | TATGGAAGTC | CCCAGGCTAG | GGATCAAATC  | ACAGCTGCAG | CTATGTCCAT |
| 12181 | GCCACTGCCT  | TGGCAACAGC | AGATCTGAGC | CACATCTGCC  | ACTTACACTG | TAGCTTACAA |
| 12241 | TAATGCTGAA  | TCCTTAACCC | ACTGCTAGAA | CCTGAATCCT  | CACAGAAACA | ATGTCGGGGT |
| 12301 | CCTTACCTCT  | CTGAGCCACA | ATGGGAAATC | TTCATTTTTT  | TTTCTGATAA | TTTGTGTGTA |
| 12361 | GTGTATAGAA  | ATGAAACAGG | TTTCAGCATA | TTAATTCTTA  | TCCTGAAGTT | TTACCCAATT |
| 12421 | CATTGATAAA  | CTCTAGTAGC | TTTTTGGTGG | TGTCTTTAGG  | ATTTTCTATG | TATAGATTCA |
| 12481 | TGTTACCTGC  | AAACAGTGCC | ATTATTACTT | CCTTTTTTCC  | AAATTGGATT | CCTTTTATTT |
| 12541 | CTTTTTCTTC  | TCTGCTGTGA | CTAGGATTTT | CAAAATCATG  | TTGAATAAAA | GTAGCAAGAA |
| 12601 | TCAGCATCCT  | TGCTTTGTTT | CTGACCTTAG | AAGAAACACA  | TTCAGCATTT | AACTGTCGAG |
| 12661 | TATGATGTTA  | GCTGTGGGCT | TATCATATAT | GGCATTATTT  | ATTTTGAGGT | ATATTCCCTC |
| 12721 | TATACCCACT  | TTGTTGAGAA | CTTTTTATCA | TGAATGGATG  | TTAAACTTTG | TCTAAAGCTT |
| 12781 | TTTCTGCATC  | TAGATAACCC | TATTATTTTT | CTTTTCTAAT  | TTGTTTATGT | GGTGTATCAC |
| 12841 | ACTGATTTAT  | TTGCAGATGT | GCATCCATTC | ATGTATCCCA  | CTTGATCGTG | GTGTGTAATC |
| 12901 | TTTTTTAGTGT | ATTAGTGAAT | TTGGTTGCTA | GTATTTTGT   | TGAGGATTTT | TGCATATACA |
| 12961 | TTCATCAGCG  | GTATTGGATT | TTAAATCTTT | TGTATGTGTC  | TTGTTTTGGT | ATCAGGGTAT |
| 13021 | CCTCTAGGGT  | ATCCTCCTAG | AATGAGTTCA | GAAGGGTACA  | TTTCTTTGGG | GAATATATTT |
| 13081 | GGTAGAATTC  | ACTTTTGAAG | CTGTCTGGTC | CTGTTCTTTT  | GTTTGTGGGG | AAGTTCTTTT |
| 13141 | TAAATTATTA  | TTATTACTGA | TTCAATTTCA | TTACTGGTAA  | TTGGACCATT | TATATTTTCT |
| 13201 | TTTTTTTCCCT | GGTTCAATCT | TGGGAGATTG | TATGTTTTTAA | AAATTTGTCC | AGTTCTTCTA |
| 13261 | GGTTGTTTAT  | TTTATTGGAA | TGTAATTGTT | TGTTTATCTT  | TTTTTTTGCA | TTTTCTAGGG |
| 13321 | CCGCACCCAT  | GGCATATGGA | AGTTCCCAGG | CTAGGGGTCT  | AATCGGAACT | GTAGCCACTG |
| 13381 | GCCTACCCCA  | GAGCCACAGC | AACGTGGGAT | CTGAGCCGCA  | TCTTCGACCT | ATACCACAGC |
| 13441 | TCACAACAAT  | GCGGGATCCT | TAACCCACTG | AGCAAGGCCA  | GGGATTGAAC | CTGCAACCTC |
| 13501 | ATGGTTCCCTA | GTTGGATTAG | TTAACCACTG | AGCCACGACG  | GGAACTCCAA | TGGTATGTAA |
| 13561 | TTGTTTATAG  | TGATCTCTTA | TGAGTCTTTA | TTTTTCTGTA  | GTAATCATAA | CTTCTCTTAT |
| 13621 | TTCATTTTGA  | TCTTATTGAC | TTGAGCCCTC | TGTTTTTTT   | TTAGTACTC  | TAGCTAAAGG |
| 13681 | TTTATCAATT  | TTGTTTATTT | TTTTCAAGGA | TCTGGCTCTT  | AATTTTATTC | AACTTTTCTA |
| 13741 | TTTATTTTAT  | TCTCTATTTT | ATTTACTTCT | GTTTCTGATT  | TTATGATTTT | TTTCTTTCTA |
| 13801 | CTAAGTTCAG  | TTTTGGTTTG | TTCTTTTCTA | TTTCTTTTAA  | GTGTAAGGTT | ATGTTGTGTA |
| 13861 | TTTGAGATTT  | TTGTTTCTTG | AGGAAACAGG | CTTGCATATT  | TGTAAACTTC | CCTCTTAGAA |
| 13921 | TAGTTTTTCT  | TAAGTTCCAT | AGTTTTTTTT | TTTTATTTTG  | TGGTTTTTAT | TTTTCCATTA |
| 13981 | TAGTTCATTT  | ACAGTGTCTT | GCCAATTCCT | ACTATATAGC  | AAAGTGACCC | AGTCATATAT |

|       |            |            |            |            |            |            |
|-------|------------|------------|------------|------------|------------|------------|
| 14041 | ATATGTATAT | ATGTATATAT | ACACATACAT | ATACACATTA | TCCTCCATCA | TGTTCCATCA |
| 14101 | CAAGTGACTG | GATACAGTTC | CCTGTGCTAT | ATAGCAGGAT | CTCATTGCTT | ATCCACTCCA |
| 14161 | AATGTAATAG | TTTGCATCTA | TTAACCCCAG | ATGTCCCATA | GATTTGGAAT | TGTGTTTTTG |
| 14221 | TTTTCATTCG | TATTCAGGTT | TTTTTTAATT | TCCTCTTTGA | TTTCTTCAGT | AATCCATTTG |
| 14281 | TTGCTTAGTA | ATATATTGTT | TAGCCTCTGC | GTGTTTGTGG | TTTGTTGCAA | TTTTCTTCTT |
| 14341 | GTAGTTGATT | TCTAGTCTCT | TTGTGTTGTA | GTTGGAAAAG | ATGTATGATA | TGATTTCAAC |
| 14401 | TTTCCTAAAT | TTACCAAGGC | TTGTTTTGTG | GCCTAGCATG | TGATATATCC | TGAAGAATGT |
| 14461 | TCCATGTGCA | CATGAAAAAA | ATGAATATTC | TGCTGCTTTC | AAATGGAATG | CTCTCTCTAT |
| 14521 | TTCAATTATG | TCCATCTCTA | ATGTTTTGGG | AACATGTTCT | TTTGCTACCT | CATTTTGCCT |
| 14581 | AATTTGCTGT | TTTGGGTTCT | AAATATCTGG | TAGGTTGGTT | ACATTTTCCA | ACCTTGACAA |
| 14641 | AATAACCTTT | TGTTGAAACA | TCCTGTGCTT | CCCAGCAGCA | CACTCCTCTC | TGGTCACCAG |
| 14701 | AGCTATATGT | TCCAGGGGTG | CCCCCCTATG | CTGACTTTGT | GAGAACTTCT | TTTGCAGTTG |
| 14761 | GCTGACTACT | GTAGGTGGTC | TTGTAGGCAT | GGCTGGCCCC | CAGTCTGGTT | GTTTGCAAGA |
| 14821 | AGCTGCCTTG | TACAAAGGCT | GCCAGTCACT | TGTTGGTGGG | ACTGGGTCAT | GGGGTGGCTG |
| 14881 | GCTATAGAGA | CCAGGGTTGT | CTCAGGGGTA | GTGCTGTCTC | ATTTGTGGGT | TTAGCCACGT |
| 14941 | TTTGCAGTGG | GTGATTGTGG | TTCCAGGGTT | CCTAGATCTA | GTGTCAGCTT | GTGGGTACTG |
| 15001 | GGTCCCCAG  | CTGCAGGGCC | TAGGAGCTTC | AGAGCTAGAG | CTAACCTCCT | GGTGGGTAGA |
| 15061 | CTGTGTCCTG | ACAAGGCAGG | TTGTAGTGTT | ACAGTGATCC | TGGGGCTAGT | ATCTATCCAC |
| 15121 | TGGGGGGTAA | GACTTGTCCC | AGGGCTAGCA | CCAGCTCTCT | GGTGGGTAGA | TCTAGGTCCT |
| 15181 | GGAGGTCTCG | GCTGCAGGGC | CAGGGATCCA | GGAGCTGGTG | TTGACTGGTT | GGTGGACAGG |
| 15241 | GCCAAGGCCC | AGAGTGTCCC | CAGGCTAGAT | CTACTTCAGT | GATGGGTGGA | TCTAGGTCCT |
| 15301 | GTATTTCTGG | CTACAGGGCT | CTGGGATCCC | AGAGTTGGTA | TGTCAGTCAA | CTGACATACA |
| 15361 | GGGCTGGAGG | CAGAGAGTCC | TGAGGCTGGT | GCCTGCCAC  | TGGTGGGTGG | AGCTGGGATT |
| 15421 | CAGGGTCTCT | GACTGAAGTG | CCCTGGGGAT | CCCTGGGCTA | GTGCTGGCCC | ACTGGTGTGT |
| 15481 | GTTTGGTTGG | GTCCTGGCCA | TTCTGGTAGA | CAGGGCCATA | TTCCCATATT | CCAGGGTGGC |
| 15541 | TGTAGGCTCA | GGGAATCTCA | AGGCAACCTA | CTGCTGGTTA | GAGGAGTGTG | TGGGGAGGTG |
| 15601 | CTATGTCCCT | GTCCAGTTTG | TTGCTTGGCA | TGAAGCATCC | CAGTACTGGT | GCCAACAGGC |
| 15661 | TAATTAGTGG | GTCTGGGTCC | TGGTGCTAAT | AAGCTAGAGG | GAAGATTCAA | AAATGACATT |
| 15721 | TTTTTAACAC | CAGTGTCTTT | GTGGTAAAAT | GAACTCCCCA | GAATGGCTAC | CACCAGTGTG |
| 15781 | TATGTCCCCA | TGGTGAATTC | TAATTGCTCC | TGTCTCTTGA | AGTGGCTCTC | CAAGATCAAC |
| 15841 | AGGTGGGTCT | GATCTAAGCT | CCTTTCAAAT | TACTGCTTCT | GCCCTGGGTC | CCAGAACATG |
| 15901 | TGAGATTTTG | TGTGTCCTTT | AAGAGTGGAG | TCTCTATTTT | CCACTGCTCT | CTGGTTCTCC |
| 15961 | CAAAGTAAG  | CCCTGCTGGC | TTTCAAAACT | TCTGGGAGCT | TGCCTTCTTG | GTATAGGACT |
| 16021 | CCTGGGCTAG | GGAGTCTAAT | GTTTGGCTTA | GACCCCTTAC | TGCTTGGGAA | GAATCTCTGC |



|       |             |             |             |             |            |             |
|-------|-------------|-------------|-------------|-------------|------------|-------------|
| 16081 | AACTGTAATG  | AATTATCTTC  | CTATTTGTGG  | GTTGCTGAGG  | ATATGGTCTT | AACTGTTCTG  |
| 16141 | TGTTCTACCC  | CTCCTATCCA  | TCTTGTGTGG  | GTTCCCTTCTT | TATATCTTTA | GTTGTAGAAA  |
| 16201 | AGTTTTTCTT  | ATCAACAGTT  | GCTCTGTAAA  | TTGTAACCTG  | GGTGTACACC | TAGTAGGAGG  |
| 16261 | TGAGCTCAGG  | GTCTTCCTAC  | TCTGCCATCT  | TGGCCATGTC  | CTCTAAACAT | TTTGGTGTAT  |
| 16321 | TTCACTGCAA  | CCTTTTTTAAA | AATCTCAAAA  | GTGAGCTGTG  | ATTGGCTAGT | CTTGTGGATA  |
| 16381 | ATCTCTAGCA  | TTTGATGCTA  | ATCATATTTA  | TACAAATACT  | TTGTTGAAAA | GTGATGCCTT  |
| 16441 | TTTAACTATT  | ATTAAAAAAC  | GTATTGACAT  | AACTATTGCT  | ATTATACTGA | AAAGAAAAGAC |
| 16501 | CTTAGAGAAA  | ATAGCATAAG  | AGCAAAAACCA | TTAAACATGG  | AGACATCTAG | TCATAGGGTG  |
| 16561 | GAAATTTTAT  | GTGGTGCATA  | TCCCCTAACC  | AGTGGCTTTA  | CACCAGGCAC | ATCCTAACTA  |
| 16621 | AGATCTGCTC  | CCAAGTGTCT  | TCCCTGATGC  | TTTAAATTGT  | GTTACATGGA | AACTATCCTT  |
| 16681 | TGATGAAGAA  | ATGCAACCTT  | TTAAAATACA  | ACATTGAAAC  | TTTTGTGCTT | TAATTTTGCT  |
| 16741 | TTTCAACATT  | TTTTCTTTTT  | AAAAGAAGAA  | ATTTATTTGT  | TTTTTTAAAT | TTAATGGCC   |
| 16801 | ACGGCATATG  | GAAGTTCTCA  | GGCCAGGGAT  | AGAATTCAAG  | CCACAGGTGC | GACCCATGCC  |
| 16861 | ACAACGCTG   | CAACACCAGA  | TCCTTTAACC  | CACTGCACCA  | GGCCAGGGAT | TGAAGCCTTG  |
| 16921 | CCTTACTGAC  | AATCTGAGCC  | ACTTCAGTCA  | GATAAAGAAA  | TTTCTTCATT | AAGCAGAGTA  |
| 16981 | TTCACATGGT  | TTAAACTTCA  | AAATATTTAAA | GTGTAAACTC  | TTTCCCACC  | ACTGTCCCCA  |
| 17041 | GCTCACCAAC  | TCTACTTACC  | ACAGACAACT  | GATGTGGTTA  | GGGTATTTAA | ATAGTAAATC  |
| 17101 | CAAGAAAATA  | TAAACAAATC  | CGTATATATA  | GGTTTCACCC  | CATTTTATTA | TCCTAATGTT  |
| 17161 | GCATATCATA  | TAAACTATAC  | TGTCCCTTGG  | GTATTCACTT  | AGTAAAATAT | TTTGATCATA  |
| 17221 | ATTTCCATATC | AGTATTTAAA  | GAGCTTTCTG  | AAATTATTTT  | TGTATAACAT | TTCTTTTCTC  |
| 17281 | ATCATCTATT  | ATGTGCATTT  | ATTTATATTT  | TAACTTCTTT  | TATTAGATGA | AATTATCTTC  |
| 17341 | TGCTTCAGCT  | TTTTTTTTTT  | TTTAAAGAACA | CACAGTTGGG  | TTTTTTAAGG | TTAATACCAC  |
| 17401 | CTTTGTTTTT  | TAAGTCATTA  | AATTTGTTTT  | TCTATTAATT  | CACTTCTGAT | TCTTTGAAGT  |
| 17461 | TTGATTTCTT  | TTTAGCTTTT  | AACTTCTTGA  | GTTGTATGCT  | TAATTAATTT | TGATTCTTTC  |
| 17521 | CTATTTATTA  | ATATACATAT  | TTGAAGCTAT  | AGGTTTTCCA  | CTGAGTATAC | CAGTAGCTAT  |
| 17581 | ATCGTATAAT  | TGATGAACTG  | ATCCTCTGTG  | AGTCTGGGAC  | ATAAACGTCC | TATGACTGTT  |
| 17641 | ATGTGGTAGC  | TGTGAATTGC  | TCTTTTTAGA  | TTATAAAGTT  | CTCATCTTTT | ATAGTTGAAC  |
| 17701 | AATTTTTGTC  | CTGAATCAAA  | TTTGTGGAT   | ATTAATATCA  | CATCTATTGC | TTTATTTATT  |
| 17761 | TTCTATTCTC  | ACTTTTAAACC | TCTGTGAATA  | ATTTCACTCT  | AGGTGCCTCA | CTTTTTTCAT  |
| 17821 | AATAGAATTG  | GGATTTATTT  | TTAAAAGGAC  | TCTGATTAAG  | TAATTTTCTT | TTTCTGATAT  |
| 17881 | GGGAGATATA  | TTTGACCTTA  | ACTTAGTCAC  | ATTATGCATT  | GTTCTCTTGT | CATGTTATGT  |
| 17941 | ATACATAACA  | TTTATTGTCA  | TTATGGTACA  | ACTAAAACA   | TATTTCACTC | TGTGACCTTT  |
| 18001 | ATGGGGACTC  | AGCATTTGTT  | TAGGAATGTG  | GAAGTATATT  | TGTATATCTG | ATAATTTCCCT |
| 18061 | TCCAAATTTA  | AAAAGGTTTG  | TATATTTTCA  | TATTAACATA  | TTTCATATTA | ATTAGCATGA  |

|       |             |            |             |            |            |            |
|-------|-------------|------------|-------------|------------|------------|------------|
| 18121 | ATTTACAGCTG | CATTAAGAGG | AAAACCACCT  | GAGTGGTAAA | GAAAAAGTTT | TTTTTCTCT  |
| 18181 | TTTTTTTTTT  | TTTTTTTTTA | ATGGCCACAT  | CTGTGGCATG | TGAAGTTCCC | AGGCTAGGGG |
| 18241 | KCGAATAGGA  | GCTACAGCTG | CCAGCTTGCA  | CCACAGCCAC | AACAATGCCA | GAGCCAAGCC |
| 18301 | TCATCTGCGA  | CCTATACCAC | AACTCATGGC  | AATGCTGGTT | CCTTAACCCC | CTGAGTGAGG |
| 18361 | CCTGGGGTCA  | AACCCACATC | CTCATGGATA  | CTAACCGGCT | TTGTTACCGC | TGAGCCATGA |
| 18421 | GGGAACTCC   | CTTTTTCTCA | TTGAAAATAA  | GTCAAATAGA | TAAGCAGCTT | AAGGCTGTTT |
| 18481 | GGGTGATTCT  | GTGGTCCAGT | AATTATCAAA  | TCCTACTGGA | CAAGAATAGA | GAATGTGCAA |
| 18541 | ATGAGGGAAC  | GTGTTGGTGA | GATCAGGCTC  | TGCCCACTGA | GCTATCCTCT | GTCATGGGCC |
| 18601 | CTGTGCTGTT  | CTCAGAGCTG | TACTTCCTAG  | GGCATTGTTC | TCATTTCAAT | TCTGAGTTCA |
| 18661 | GTGTGGAGAG  | TATACGTGTG | TGGGGGCTGC  | ACGCTTTTCA | CAACCCACTT | TCTGCTGATA |
| 18721 | CTGATTTAGG  | GATCCTTGGA | TTGCTTTACA  | GTTGAGTCAT | CATTAAGTAG | TGTCACTTGC |
| 18781 | CTTCAAAGTC  | AGCAAATAA  | TTGTCTCAA   | ACTAGTAGGC | TTCTAGTGTA | TTTGCTTTAA |
| 18841 | TCCAATGCCA  | TGTGAAAGTA | ACATGGTCAA  | AGAATAAGTT | ATATACCTTG | ACCTACCCTG |
| 18901 | TGACCAGGCT  | CTTCCTCTTA | ATTTATTGAC  | CACTGCCTTA | AGGTCATTTG | AAACCATGGG |
| 18961 | TTTGGGAGGA  | AGGCAAGGCC | TAAATCCCGT  | CTTTGTTGGA | AGGCTCACTG | TCCTTGTCTT |
| 19021 | TAGAGCATCA  | TTTTTTTTTA | AACTGGGGTA  | CAGTTTATTT | ACAGTGTTGT | GTCAATTTCT |
| 19081 | GCTGTACAGC  | ATAGTGACCC | AGTCATACAC  | ATACATACAT | TCTTTTTCTC | ATACTATCTT |
| 19141 | CAATTTTATT  | TTGTGCTAAG | TCTGCCATTT  | TATCATCACC | TCAGTTTGAA | GGACAGGATA |
| 19201 | TTTAGAGTTT  | GTTTTTTTTT | TCCCCCAAT   | CCTGCAATTT | CTAAATTATA | AGACTCTCAA |
| 19261 | TTAGCCGTAT  | ATAACAGCTG | CAGGCACAGG  | ATGTCTCCCT | CACAAAATTG | GTATTTTCC  |
| 19321 | TTCCATTTCT  | TCTTGACAGT | TGGCTATTTT  | TTGTCTGAGT | TCATCTCTCT | TTTTAAGTGT |
| 19381 | TAAAAAGGGC  | AAGGAGGATT | CATGCTATGT  | CAACATTATG | ATTTTTCTT  | TTCTATACTT |
| 19441 | GATAAGAGTA  | TACTTTTCCC | AAATGTCATC  | CAACTTTTCA | GCATCAGTTT | GGACATGGTT |
| 19501 | TTCTTTTCAA  | GGTGGTATTT | CTCTAATGTC  | ACTTGAATAA | CAAGACTCGT | TAGTTCTCCA |
| 19561 | GGCTACAATA  | TCCTAGTCTG | AGTATATTCT  | GCATGTTAAT | TCTATTCAGC | CACATCCATA |
| 19621 | ATTTAGGTTT  | TATTCCTGGA | ACACCTCACT  | TTTTTTTTTT | TTTTGGTCTT | TTTATAGCCA |
| 19681 | TAACCATGGC  | ATATGGAGGT | TCCCAGGCTA  | GGGGTCTAAT | CTGAGCTTTA | GCCACTGGCC |
| 19741 | CATGCCACAG  | CCACAGCCAT | GCCACATCTG  | AGCCACATCT | GTGACCTTTT | CCACAGCTCA |
| 19801 | CAGAAACACC  | AGATCCCTAA | CCCCTGAGT   | GAGGCCAGGG | GTCAAACCTG | TAACCTCATG |
| 19861 | GTTCCTAGTC  | AGATTCGTTT | CCTCTGTACC  | ACGATGGGAA | TTCCTAATAC | CTCACTTATG |
| 19921 | ATAACACATT  | CTGAATTATT | TAGGATTCTA  | TTATACTGCA | TGTAATAGAA | ATCCCAAATA |
| 19981 | GCAAAATTTG  | CAACTTAAGG | CAGGTTCCCTG | TCTTTACAAA | ATCATGTTTT | CCTTTGCTAT |
| 20041 | ATGTGCACTT  | TGCTTTCTC  | TGTGAATTCC  | CTTTTTTGTT | ATATTTCTAT | AGCTTTTGGA |
| 20101 | AACACTTTTA  | CTTATTTGGG | GGGGCCTAGA  | TTTTTAACCC | TCTCCTTGTT | TTTCTAGAAA |

|       |             |            |             |             |            |            |
|-------|-------------|------------|-------------|-------------|------------|------------|
| 20161 | TAGAGTTTAT  | AATTTTATTT | CTTCATTTAC  | TTGATACTTT  | CAAGAGATTT | CCAGGAAAAA |
| 20221 | AATTATGGAA  | ATACTGTCTC | TGTGCCTGCC  | AAGTTCAAAC  | TAAGAATTGT | ATAATCTGTT |
| 20281 | TTAATTCTTA  | AGCATTTATA | GATGACAAGG  | CTTTGTGTCT  | GATAGGGGCC | AGCGAACTCA |
| 20341 | GTAAGAGGG   | AAGATGAGAA | AGATAATGGC  | AAGAATTTAT  | CCCTGAAGTG | TAGTTTTGAC |
| 20401 | AAACCAGTCA  | CAAAGAGGTC | TAAGAAAATTT | TGGTCACAAA  | GTTGTTTTGA | ATCCCAGGCA |
| 20461 | TTTTATTTGC  | AATGATTGCA | TATGTTCTGG  | AAAGGACATC  | TGAACCTAAG | AAATAGTTCA |
| 20521 | TTTGCATTGT  | GTTATATTTT | ACTAAGGTCT  | GAGAAAATAAT | CTTGAGATGA | GAATGAACTC |
| 20581 | TACTTCTTCA  | GAGTCTGGAA | GGAATAAATT  | ATGAAAATGT  | ATTAATGCTT | CTTTAAACCA |
| 20641 | TATTGTATAT  | TTATCTATTA | CTAAACAAAA  | AGAAGTAGCT  | CTATTTATTT | ATTTATTTAT |
| 20701 | TTATTTATTT  | ATGTCTTTTG | TCTCTTTAGG  | GCCACACCTG  | TGGCATATGG | AGGTTCCCAG |
| 20761 | GCTAGAGGTC  | CAATTGGAGA | TGTAGCAGCC  | AGCCTATGCC  | AGAGCCACCG | CAACACGGGA |
| 20821 | TCTGAGCCAC  | GTCTGTGACT | TACACCACAG  | CTCACAGCAA  | CGCCTGATCC | TCAACCCACT |
| 20881 | GAGCGAGGCC  | AGGGATCGAA | CCCATGTCCT  | CATGGATGCT  | AGTTGGGTTC | ATTAACTGCT |
| 20941 | GAGCCATGAT  | GGGAACTCCA | AATTAATTAT  | TTCTTATATT  | TGTTCTTCAT | ATATTCATTT |
| 21001 | CTATAGAAAAG | AAATAAATAC | AGATTCAGTT  | AATGATGGCA  | GGTAAAAGCT | TAACCTATTA |
| 21061 | ATCAAAGGAG  | TTAATCCAGG | CACAAAAAATT | CAATTCATGG  | CTCTCTGTTA | AAATTTAGGT |
| 21121 | ATAGGTTTAG  | CAGGAAGAAA | AGGTTAGTAG  | ATGCAGACTA  | TTACATTTAG | AATGGATGGA |
| 21181 | CAATGAAGTC  | CTACTATACA | GCACAGGGAA  | CTATATCCAA  | TCTCTTGGGA | TAGAATATGA |
| 21241 | TGGAAGACAA  | AATCAGAACA | AGAGAGTATA  | TATATATGTG  | TGTGTGTGTG | TGTGTGTGTG |
| 21301 | TGTGTGTGTG  | TGTGTGTGTG | ACTGGGTCAC  | CCTGCGGCAC  | AGCAGAAATT | GGCAGAACAT |
| 21361 | TGTAAATCAA  | CTATACTTTA | ATAGGAAAAA  | TACTTTTAAG  | GGCTAAATTT | CCAATATTCT |
| 21421 | AACCATGTAC  | ACAGAGTAAA | TGTCATAAAG  | ATGCCAGTCT  | GTGTAGAGAT | TGATGTGTTA |
| 21481 | CTAGCAGATT  | CATGAAATAA | AGGCTGAGGA  | TGTAGTCCCC  | AAGTCACTTC | TGAGTGGAAG |
| 21541 | AATTTCTCCT  | TTGTCCTGGA | CTCAAATATT  | TTAGGATAAA  | GGAAAAAAGA | AGATATTTAT |
| 21601 | AGAAGGGACT  | TGTTTTCAAG | TACTTGACAA  | AATTTACCA   | TTAAAGAGAA | ATTTGTGGGA |
| 21661 | GTTCCCATCG  | TGGCTCAGTG | GAAACAAATC  | CAACTAGGAA  | CCATGAGGTT | GTGGGTTTGA |
| 21721 | TCCCTGGCCT  | CACTCAGTGG | GTAAAGGATC  | CGGTGTTGCC  | GTGAGCTGTG | GTGTAGGTTG |
| 21781 | CAGACACGGT  | TCTGATCCTG | CGTTGCTGTG  | GCTGTGGCTG  | TGGTGTAGGC | CAGCAGCAAA |
| 21841 | CAGCTCTGAT  | TAGACCCCTA | GCCTGGAAAC  | CTCCATATGC  | CACAGGTGCA | GCCCTAAAAA |
| 21901 | GACAAAAAAA  | GAGAAAAGAC | AAAAAAAAAA  | AAAAAAAAAA  | AAAAAAAAAA | AAAAAAAAAN |
| 21961 | NNNNNNNNNN  | NNNNNNNNNN | NNNNNNNNNN  | NNNNNNNNNN  | NNNNNNNNNN | NNNNNNNNNN |
| 22021 | NNNNNNNNNN  | NNNNNNNNNN | NNNNNNNNNN  | NNNNNNNNNA  | GAACCACCAG | AGGTATTTAT |
| 22081 | TTGTTTTTGC  | CTTTTTTCAC | TGACTGTTTT  | TTGTTTGTTT  | GTTTGAGACT | GATCTAGAAG |
| 22141 | ACTAGAGATT  | ACAAGAAATA | TGGATTTGGC  | TCACTCTAAG  | AAACTGCTTT | CATTCCAAGG |

|       |                    |                   |                   |                    |                    |                    |
|-------|--------------------|-------------------|-------------------|--------------------|--------------------|--------------------|
| 22201 | TTTGGGTCTA         | TCCAAAAGTG        | GAATAGAATC        | ATATGAATAC         | TAGTTTATGA         | GTATTTAGTG         |
| 22261 | AGAGGAATTT         | CAAGCTCAAA        | TAATGATTCA        | GCAAGATTAA         | ATTAAGGAGG         | GAATTTTCCT         |
| 22321 | TGTGGCTGAG         | TGGGTAAAGG        | ACCCAATGTT        | GTCTCTGTGA         | GGATGTAGGT         | TCCATCCTGG         |
| 22381 | GCTTTGCTCA         | TTAGGTTAAG        | GATCTGGCAT        | TGCTGCAGCT         | CAGACCCAGT         | GCTGCCCTGG         |
| 22441 | TTGTGGCTTA         | GGCCAAAGCT        | GCAGCTCCAA        | TTCAATCTCT         | GGCCTGGGAA         | CCTCCATGTG         |
| 22501 | CTACAAGGTG         | CGGCCTTAAA        | AGGAAAAAAA        | AAAAAATTAA         | ATCAAGGACT         | CAAGAGTCTT         |
| 22561 | TCATTATTTG         | TGTTGTGGAA        | GCTATATTTG        | TTTTAAAGTC         | TTAGTTGTGT         | TTAGAAAAGCA        |
| 22621 | AGATGTTCTT         | CAACTCAAAT        | TTGGGAGGGA        | ACTTGTTTCA         | TACATTTTTA         | ATGGATAAGT         |
| 22681 | GGCAAAATTT         | TCATGCTGAG        | GTGATCTATA        | GTGTTGTAAT         | GCAGAATATA         | GTCAGATCTT         |
| 22741 | GAACATTTTA         | GGAAGTTGGT        | GAGGGCCAAT        | TGTGTATCTG         | TGCCATGCTG         | ATAAGAATGT         |
| 22801 | CAAGGGATCA         | CAAGAATTCG        | TGTTATTTGA        | CAGCAGTCAT         | CTTTAAAAGG         | CATTTGAGAA         |
| 22861 | AGTCCAATTT         | CAAATGCATT        | TCCTTTCTTT        | AAAAGATAAA         | TTGAAGAAAA         | TAAGTCTTTA         |
| 22921 | TTTCCCAAGT         | AAATTGAATT        | GCCTCTCAGT        | CTGTTAAAAG         | AAACTCTTAC         | CTTGATGATT         |
| 22981 | GCGCTCTTAA         | CCTGGCAAAG        | ATTGTCTTTA        | AAATCTGAGC         | TCCATGTCTT         | CTGCTTTATT         |
| 23041 | TCTGGTGTGC         | CTTTGACTCC        | <b>AGATTACAGT</b> | <b>AAATGGAGGA</b>  | <b>CTGAGTATAG</b>  | <b>GGCTAAAAAG</b>  |
|       |                    |                   | <b>GAT T cut.</b> | <b>sgSL27</b>      |                    |                    |
| 23101 | TAGAGAGAAT         | GGATGCATAT        | TATCTGTGGT        | CTCCAATGTG         | ATGAATGAAG         | TAGGCAAATA         |
| 23161 | CTCAAAGGAA         | AGAGAAAGCA        | TGCTCCAAGA        | ATTATGGGTT         | CCAGAAGGCA         | AAGTCCCAGA         |
| 23221 | ATTGTCTCCA         | GGGAAGGACA        | GGGAGGTCTA        | <b>GAATCGGCTA</b>  | <b>AGCCCACTGT</b>  | <b>AGGCAGAAAA</b>  |
|       |                    |                   |                   | <b>sgSL26</b>      | <b>cut. C TGT</b>  |                    |
| 23281 | ACCAAGAGGC         | ATGAATGGCT        | TCCCTTTCTC        | ACTTTTCACT         | CTCTGGCTTA         | CTCCTATCAT         |
| 23341 | GAAGGAAAAAT        | ATTGGAATCA        | TATTCTCCCT        | <b>CACCGAAATG</b>  | <b>CTATTTTTCA</b>  | <b>GCCCACAGGA</b>  |
|       |                    |                   |                   | <b>CAC C cut.</b>  | <b>sgSL25</b>      | <b>Exon 7</b>      |
| 23401 | <b>AACCCAGGCT</b>  | <b>GGTTGGAGGG</b> | <b>GACATTCCCT</b> | <b>GCTCTGGTGC</b>  | <b>TGTTGAAGTA</b>  | <b>CAACATGGAG</b>  |
| 23461 | <b>ACACGTGGGG</b>  | <b>CACCGTCTGT</b> | <b>GATTCTGACT</b> | <b>TCTCTCTGGA</b>  | <b>GGCGGCCAGC</b>  | <b>GTGCTGTGCA</b>  |
| 23521 | <b>GGGAACTACA</b>  | <b>GTGCGGCACT</b> | <b>GTGGTTTCCC</b> | <b>TCCTGGGGGG</b>  | <b>AGCTCACTTT</b>  | <b>GGAGAAGGAA</b>  |
| 23581 | <b>GTGGACAGAT</b>  | <b>CTGGGCTGAA</b> | <b>GAATTCCAGT</b> | <b>GTGAGGGGCA</b>  | <b>CGAGTCCCAC</b>  | <b>CTTTCACCTT</b>  |
| 23641 | <b>GCCCAGTAGC</b>  | <b>ACCCCGCCCT</b> | <b>GACGGGACAT</b> | <b>GTAGCCACAG</b>  | <b>CAGGGACGTC</b>  | <b>GGCGTAGTCT</b>  |
| 23701 | <b>GCTCAA</b> GTGA | GACCCAGGGA        | ATGTGTTTAC        | TTTGTT <b>CCCA</b> | <b>TGCCATGAAG</b>  | <b>AGGGTAGGGT</b>  |
|       |                    |                   |                   | <b>sgSL28</b>      | <b>cut.</b>        | <b>GG GTA</b>      |
| 23761 | TAGGTAGTCA         | CAGACATCTT        | TTTAAAGCCC        | TGTCTCCTTC         | CAG <b>GATACAC</b> | <b>ACAAATCCGC</b>  |
|       |                    |                   |                   |                    | <b>Exon 8</b>      |                    |
| 23821 | <b>TTGGTGAATG</b>  | <b>GCAAGACCCC</b> | <b>ATGTGAAGGA</b> | <b>AGAGTGGAGC</b>  | <b>TCAACATTCT</b>  | <b>TGGGTCCCTG</b>  |
| 23881 | <b>GGGTCCCTCT</b>  | <b>GCAACTCTCA</b> | <b>CTGGGACATG</b> | <b>GAAGATGCC</b>   | <b>ATGTTTTATG</b>  | <b>CCAGCAGCTT</b>  |
| 23941 | <b>AAATGTGGAG</b>  | <b>TTGCCCTTTC</b> | <b>TATCCCGGGA</b> | <b>GGAGCACCTT</b>  | <b>TTGGGAAAGG</b>  | <b>AAGTGAGCAG</b>  |
| 24001 | <b>GTCTGGAGGC</b>  | <b>ACATGTTTCA</b> | <b>CTGCACTGGG</b> | <b>ACTGAGAAGC</b>  | <b>ACATGGGAGA</b>  | <b>TTGTTCCGTC</b>  |
| 24061 | <b>ACTGCTCTGG</b>  | <b>GCGCATCACT</b> | <b>CTGTTCTTCA</b> | <b>GGCAAGTGG</b>   | <b>CCTCTGTAAT</b>  | <b>CTGCTCAG</b> GT |
| 24121 | AAGAGAATAA         | GGGCAGCCAG        | TGATGAGCCA        | CTCATGACGG         | TGCCTTAAGA         | GTGGGTGTAC         |

|       |                   |                   |                    |                   |                    |                    |
|-------|-------------------|-------------------|--------------------|-------------------|--------------------|--------------------|
| 24181 | CTAGGAGTTC        | CCATTGTGGC        | TCAGTGGTAA         | CAAACCTCGAC       | TGGTATCCAT         | GAGGGTATGG         |
| 24241 | GTTTGATCCC        | TGGCCTTGCT        | CAATGGGTTA         | AGGATCCAGC        | ATTGCTGTGA         | GCTGTGGTAT         |
| 24301 | AGGTTGCAGA        | CTCTGCTCAG        | GTCCCATGTT         | GCTGTGATTG        | TGGTGTAGGC         | TGACTGTTGC         |
| 24361 | AGCTTCAATT        | TGACCCCTAG        | CCCGGAATT          | TCCATAGGCC        | ACACGTGCAG         | CACTAAGGAA         |
| 24421 | GGAAAAAAAA        | AAAAAAAAAA        | AAAAGAGTGG         | GTGTGCCTAT        | AGTGAAGAAC         | AGATGTAAAA         |
| 24481 | GGGAAGTGAA        | AGGGATTCCC        | CCATTCTGAG         | GGATTGTGAG        | AAGTGTGCCA         | GAATATTAAC         |
| 24541 | TTCATTTGAC        | TTGTTACAGG        | GAAAGTAAAC         | TTGACTTTCA        | CGGACCTCCT         | AGTTACCTGG         |
| 24601 | TGCTTACTAT        | ATGTCTTCTC        | AGAGTACCTG         | ATTCATTCCC        | AGCCTGGTTG         | ACCCATCCCC         |
| 24661 | CTATCTCTAT        | GGCTATGTTT        | ATCCAGAGCA         | CATCTATCTA        | ACACTCCAGC         | TGATCTTCCT         |
| 24721 | GACACAGCTG        | TGGCAACCCT        | GGATCCTTTA         | ACCAACTGTG        | CCAGGCTGGA         | GATCAAACCT         |
| 24781 | AAGCCTCTGC        | AGCAACCCAA        | GCTGCTGCAG         | TCAGATTTTT        | AACCCCTGT          | GCCACTGTGG         |
| 24841 | GTATCTCCGA        | TATTTTGTAT        | CTTCTGTGAC         | TGAGTGGTTT        | GCTGTTTGCA         | <b>GGGAACCAGA</b>  |
|       |                   |                   |                    |                   |                    | <b>Exon 9</b>      |
| 24901 | <b>GTCAGACACT</b> | <b>ATCCCCGTGC</b> | <b>AATTCATCAT</b>  | <b>CCTCGGACCC</b> | <b>ATCAAGCTCT</b>  | <b>ATTATTTTCAG</b> |
| 24961 | <b>AAGAAAATGG</b> | <b>TGTTGCCTGC</b> | <b>ATAG</b> GTGAGA | ATCAGTGACC        | AACCTATGAA         | AATGATCTCA         |
| 25021 | ATCCTCTGAA        | ATGCATTTTA        | TTCATGTTTT         | ATTTCCCTCT        | TGCAG <b>GGAGT</b> | <b>GGTCAACTTC</b>  |
|       |                   |                   |                    |                   |                    | <b>Exon 10</b>     |
| 25081 | <b>GCCTGGTCGA</b> | <b>TGGAGGTGGT</b> | <b>CGTTGTGCTG</b>  | <b>GGAGAGTAGA</b> | <b>GGTCTATCAT</b>  | <b>GAGGGCTCCT</b>  |
| 25141 | <b>GGGGCACCAT</b> | <b>CTGTGATGAC</b> | <b>AGCTGGGACC</b>  | <b>TGAATGATGC</b> | <b>CCATGTGGTG</b>  | <b>TGCAAACAGC</b>  |
| 25201 | <b>TGAGCTGTGG</b> | <b>ATGGGCCATT</b> | <b>AATGCCACTG</b>  | <b>GTTCTGCTCA</b> | <b>TTTTGGGGAA</b>  | <b>GGAACAGGGC</b>  |
| 25261 | <b>CCATTTGGCT</b> | <b>GGATGAGATA</b> | <b>AACTGTAATG</b>  | <b>GAAAAGAATC</b> | <b>TCATATTTGG</b>  | <b>CAATGCCACT</b>  |
| 25321 | <b>CACATGGTTG</b> | <b>GGGGCGGCAC</b> | <b>AATTGCAGGC</b>  | <b>ATAAGGAGGA</b> | <b>TGCAGGAGTC</b>  | <b>ATCTGCTCGG</b>  |
| 25381 | GTAAGTTCTG        | CACATCACTT        | CGGGTTACAA         | TGATTTAAGA        | AACAACCTAAG        | GTGGGGCAAA         |
| 25441 | GGGTAGTGAG        | GCATATCCAT        | CAGAGCAAAT         | TCCTTGAAAT        | ACGGACTCAG         | AGGAAACCAT         |
| 25501 | TGTGAGATTG        | AGGTTCCCAG        | AGGTGTGGAT         | TTAATGAATT        | AGTGTTACCT         | CATGTACAAG         |
| 25561 | GTAGTATACT        | ACCAGAAAGA        | TAAAAATTCA         | GAAGCGAGTT        | TGCAGCAAAA         | CTCATAGGGA         |
| 25621 | GAACTTCTTT        | TATAAATAAT        | ATGAAGCTGG         | ATATTTAGTG        | CACCACCTGA         | TGACCACTTT         |
| 25681 | ATTAATAAAT        | AAAGAGTTCC        | TGTTGTGGCG         | CAGCGGAAAT        | GAATCCGACA         | AATAATCATG         |
| 25741 | AGTTTGCGGG        | TTTGATCCCT        | GACCTCGCTC         | AGTGGGTTGG        | GGATCTGGTG         | TTGCCATGAG         |
| 25801 | CTGTGGTGTA        | GGTCGCAGAT        | GCTGCTTGA          | TCCCGCTTTG        | CTGTGGCTGT         | GGTATAGTCT         |
| 25861 | TGTGGCTACA        | GCTCCGATTT        | GACCGCTAGC         | CTGGGAACCT        | CCATATGCTG         | CGGGGGTGGC         |
| 25921 | CCTCAAAGC         | AAAATAAATA        | AATAAGTAAA         | TAAATAAGTA        | GTTTAAAAAG         | GACAAGAAGA         |
| 25981 | AATATATTTG        | GTATTATATT        | CTACAGAGAC         | AAAGATAATC        | ACCATGCCCC         | ATTGATTTTT         |
| 26041 | CAAGGCATAT        | AAATGAGACG        | TCATGGGAGC         | AAAAATGGTC        | ATAATACAAT         | GCCCTTGTTT         |
| 26101 | TGTGTACATG        | GTAAGATTTT        | AGAAAGCATT         | GTGAAGTAGA        | AAAGTGTACT         | CAGTTATAAT         |
| 26161 | ATATTGGAGA        | AAACAGTACT        | ATGAGAAGTA         | AAAAAATCTA        | CATGCCGGAA         | TTTATTTTTT         |

|       |                |             |            |             |                |            |
|-------|----------------|-------------|------------|-------------|----------------|------------|
| 26221 | TAATGTCTCT     | TTAGAGTCGC  | ACATGCGGCA | TGTGGAGGTT  | CCCAGGCTAG     | GGGTCGAATC |
| 26281 | AGAGCTATAG     | CCACTGGCTT  | ATGGCACAGC | CACAACAACG  | CTAGATCTGA     | GCCACATCAG |
| 26341 | AGACCTATAC     | TATAGCTCAT  | GGCAATGCCA | GATCCTTAAC  | CTACTGAGCC     | AAGCCATGGG |
| 26401 | TCAAATCCAG     | GTCCTCATGG  | ATCCTAGGCA | AATTCATTTT  | TGCTGAGCCA     | CGAAGGGAAC |
| 26461 | TCCTCAGAAG     | TGATTTTGAT  | GTTACTTTCT | TTTCATGACA  | AATCTGGTAA     | AGTACATACA |
| 26521 | CATAGAACT      | GAAGTGTCAG  | AAAGGGAAAT | ATTTCATTTT  | AAGGTAATGT     | ATACAAAACA |
| 26581 | GTGGTTTTAC     | CATCTGAGTA  | TCTTGCTAAA | TTTTAACTAT  | CAAGGACAAT     | TGCCAAAAAA |
| 26641 | AAAAAAAAAA     | GAGAGAGAGA  | GAGAACAGAA | TAGGGTTATG  | AAGCTAAAAT     | CACAGGGTTA |
| 26701 | TGAAGCTAAA     | ATCACAGTAA  | TTTAGGGAGA | AAAAAATCCA  | AAGCATGTAA     | TTGATAAAAG |
| 26761 | GCTCTGAGCC     | TTTGTTTGAG  | ATTTAGAATT | CAACTTGGAA  | ATACCGGTGG     | TATTTTAAAG |
| 26821 | CAGTCCATAA     | GTATAAAATC  | CAAGGCTAAA | AAGCCAGAAG  | GTATTTGTAG     | AACAAATATA |
| 26881 | TTTTAATAAG     | CTCTACCAAG  | TCATCCAGAA | GCTACTAAAG  | AATTACTGGT     | CACTGACATA |
| 26941 | GTGTACCTGT     | TTTCAAGGCC  | ATTCTTACAT | CAGAATAAAG  | GGAGAGCACC     | CTCTGAATCT |
| 27001 | TCAGAAAAGA     | TGTGAAAGTG  | CTAATTCTCT | ATTTCATCCC  | AGAGTTCATG     | TCTCTCAGAC |
|       |                |             |            |             | <b>Exon 11</b> |            |
| 27061 | TGATCAGTGA     | AAACAGCAGA  | GAGACCTGTG | CAGGGCGCCT  | GGAAGTTTTT     | TACAACGGAG |
| 27121 | CTTGGGGCAG     | CGTTGGCAGG  | AATAGCATGT | CTCCAGCCAC  | AGTGGGGGTG     | GTATGCAGGC |
| 27181 | AGCTGGGCTG     | TGCAGACAGA  | GGGGACATCA | GCCCTGCATC  | TTCAGACAAG     | ACAGTGTCCA |
| 27241 | GGCACATGTG     | GGTGGACAAT  | GTTCAGTGTC | CTAAAGGACC  | TGACACCCTA     | TGGCAGTGCC |
| 27301 | CATCATCTCC     | ATGGAAGAAG  | AGACTGGCCA | GCCCCTCAGA  | GGAGACATGG     | ATCACATGTG |
| 27361 | CCAGTGAGTA     | TCCATTCTTT  | AGCGCCACTG | TTATCTTCTG  | ATCTACCTAA     | GCAGAAGTGT |
| 27421 | TATAACCTTT     | AGATAATCCC  | TATTCTACCT | GGATGATGAG  | ATTCATTCTC     | TTAATTTGG  |
| 27481 | TGTGCAGGTA     | TTCAGGATCA  | GTGATCATTT | TCCCAAAGAC  | CATCATGCTC     | TGATGGTCTT |
| 27541 | CTCAAAAGTT     | CTAATCAGTT  | GCTTCTCCCG | TGAACAGTTG  | AGGAGCAGAG     | AATATGTAAT |
| 27601 | TCAGAAATTTG    | ACTATTGAAT  | CATCCCATTT | TTCTTTCACA  | TAGTCTTTTG     | TTGCACTGAG |
| 27661 | TATAAGGAGA     | GAAGCAGTCA  | GAAAGATCAA | TCCTGAATTA  | TTTCTCCATT     | CTACATCTGT |
| 27721 | TTTAAATTTT     | AAAAAAAAATT | GTTATAGGTG | ATTTACAATG  | TCTGTCAATT     | TCTGCTCTAC |
| 27781 | AGCAAAGTGA     | CCCAGTTATT  | TACATATACA | TTCTTTTTTCT | CATATTTTTTA    | AACCGGGAGA |
| 27841 | TTTCTATCCA     | CCTGGCAGTT  | TGAGGGAATT | TAACATTATG  | CATTTATGTT     | AACTTTATTC |
| 27901 | ACCTGATGTT     | TTCTAAGTCA  | TACTGAGATT | CTTATGTCCA  | GGATGGAATA     | CACCTGGTTT |
| 27961 | GCTGGAAAGA     | CATGTGCTTT  | CATAAAGATG | AATTTTGGAA  | AAAATATAAA     | ATTTAAAAGT |
| 28021 | CCCATTAAT      | AAGCAAAGTT  | TTAAGAGATT | TCAAAAAAAAA | TTTCATCTCT     | CTCTTTTCCT |
| 28081 | CTTTGACCTC     | TTGGGCACGT  | TCATCTTCTC | AAATATGATC  | TTGGTGTTTC     | TGACTTTTCA |
| 28141 | GACAAAATAA     | GACTTCAAGA  | AGGAAACACT | AATTGTTCTG  | GACGTGTGGA     | GATCTGGTAC |
|       | <b>Exon 12</b> |             |            |             |                |            |
| 28201 | GGAGGTTCCCT    | GGGGCACTGT  | GTGTGACGAC | TCCTGGGACC  | TTGAAGATGC     | TCAGGTGGTG |

28261 **TGCCGACAGC TGGGCTGTGG CTCAGCTTTG GAGGCAGGAA AAGAGGCCGC ATTTGGCCAG**

28321 **GGGACTGGGC CCATATGGCT CAATGAAGTG AAGTGCAAGG GGAATGAAAC CTCCTTGTGG**

28381 **GATTGTCCTG CCAGATCCTG GGGCCACAGT GACTGTGGAC ACAAGGAGGA TGCTGCTGTG**

28441 **ACGTGCTCAG** GTGAGGGCAG AGAGTCTGGA TTGAGCTTGG AAGCTCTGGC AGCAAAGAGA

28501 GGGTGGGCGG TGACCTGCAT TGGGTAAAGA TTGGAAGGTC CAGCCTAAGG ATCTGGTGGT

28561 GGGGGGAGAC ATGATGTTTC AGTCTGAAGA ATGATGAAAA CCTGTGTTGT TACGCATGGG

28621 CCTTCACCGA GGAAAGGAAC ATAACCTACA TGTATCCTCC TGCAGAGGGA GGAAGAATA

28681 GGGGATTCTA GTTTTGTGTG GGAAGGAGCA GTTTACTTGG TTCAGGAGGC ACTAAAGGCT

28741 CAGATAGGAA ACAGAGATCT GTTCCATTCT TACTCCAGA ACTGATTCTC TTCTCTTTTC

28801 TCCTACAG**AA ATTGCAAAGA GCCGAGAATC CCTACATGCC ACAG**GTATAT AAAAAAGTTT

**Exon 13**

28861 AAGAACATGG GACCCATTGT CTGCATTTTG TGGAATCCCT CTTATTAAGA CATTCTGGGT

28921 CAGAAGTTCT GAGGATTTGA CATTACTTTC AGCTATCTGT TATCTTACCC AAGAGAGGGA

28981 TGGTAACTAG GAACCCAGGT CTTTTAGCTA AGACATTATC ACCTCTTGTG ATGTTTACTT

29041 GTTCTCAG**GT CGCTCATCTT TTGTTGCACT TGCAATCTTT GGGGTCATTC TGTTGGCCTG**

**Exon 14**

29101 **TCTCATCGCA TTCCTCATTG GGAATCAGAA GCGAAGACAG AGGCAGCGGC TCTCAG**GTCT

29161 GAACAAAATT ACGGTCTCTC TAATGTTTCT ATGGGATAAG AAGCCTCTCT GGATAATAAA

29221 ACAAAAAAAT TACATTCAAG TATCAGTTGG CCAGAAAGAG GGAACCTAGA AGAGGTTTAA

29281 GCAGTTTCTC CGAAACAGGG AACAAAGAATT CAGAGAAGAA AAGGCACATT GGCTGTACTG

29341 ATGATACCTG CACTCGCTAT GTATGTTTAA TGGGGGACAG TAGAGAATTG ATAGTTTAGA

29401 AGGAGTATGC TTATATGGTT CTGGATGAAT CCTGTATCCC CCCAACATT TATTTTCTCT

29461 TACTATATAC TTATTACTAA TTAACTCTT CTGTCAAGCC GTGTGCTAGG TTCTGAAGAT

29521 GGTTCACTG TGGATACTCA AGTGCTTTTG TTTTCATGGA ATTTCCAGTT TAGTGAAGA

29581 GATAAATATG TAAACAAATA AATTGCAATG TTTTATTATA CATTTCGTGTG AATAAGGAAC

29641 AAAGGAGGCA CAGAGAATAA AGTAATTACT GAAAGGGGAA GGGGAGTATC AGAGACTTCT

29701 AAGTTTGGAG GCAGATTTTG AAGACAGAAA TCAAAGTACT GGGTAAGATG CATTTCAGGA

29761 AAGAAGAAAA ATATGTACAC GTGTAGAGAA GCTTAAAAGA GGGCACATTT GTTGTTTTGG

29821 AGGGGAGTAC AAGTTGAGTT AAAGAGAGAA GTTTCTGTTA AGGCTGAAGA ATAGGAAGA

29881 TACACGTAGC GATGCTCTGT GTTGATGAT AAGAAGAGTC GGAGTTATTA AAGAGTATGA

29941 GATAGGGGAG TGAGATAGGC AGGCAGGTCC TTAGAAAGTT CTGTTTGGAA ATGGGATGTC

30001 GGAGGGGTTG AAAGAGAACC ATATATTGAC AAGGAGAGCA TTTTGAAGTA GTTGTGATGA

30061 AAGATAAAAT GGAATTTATA GTGAGAATGG CTGGGAAAGG ATAGATTTTA TACAAATCTC

30121 CAATGAATTA CAGAAGAATG CTACCTGTCT TTGGGGAAGA AACAGGGTTA TCCGATGGCA

30181 TCCTGTTGCG TTTGAGTTCG TGACATCATG AGGGAAAGGC TTGGCAGCGT TTAATCGGTA

30241 CTGTGTGGTA ACTTATATGG AAAAAAATAT GAGAAGGAAT GAGTGTGTGT ATAACAAAT

|       |                   |                    |                   |                   |                   |                   |
|-------|-------------------|--------------------|-------------------|-------------------|-------------------|-------------------|
| 30301 | TACTTAGCTG        | TATGCCTGAA         | ATTAATACAA        | TTTTATAAGT        | CAACTCTACT        | CCAATAAAAC        |
| 30361 | AAACAAATAA        | ATAAATAAATT        | TTAACTACCT        | GAACAAAAAA        | AAAAGAATGG        | ACTGGAGACA        |
| 30421 | AGTCAAAAGT        | ATGGATGATG         | ACTACGTTAT        | GCTTGCACTG        | CTGGGGAAAA        | GCACACATAG        |
| 30481 | GGAGGGAACG        | TTTTATTATG         | ACCCAGTCCC        | TAACCTATGA        | CCTCTGTTAT        | CAGTTTTCTC        |
|       |                   |                    |                   |                   |                   | <b>Exon 15</b>    |
| 30541 | <b>AGGAGGAGAG</b> | <b>AATTCTGTCC</b>  | <b>ATCAAATTCA</b> | <b>ATACCGGGAG</b> | <b>ATGAATTCTT</b> | <b>GCCTGAAAGC</b> |
| 30601 | <b>AGATGAAACG</b> | <b>GATATGCTAA</b>  | <b>ATCCCTCAGG</b> | TCCGTGGGTT        | CTTTGAGGGC        | CTGTAGCCCT        |
| 30661 | GGGGTTCAGA        | TCAGCAGCTG         | CAGTTGAGGT        | TGAGGCATGC        | TACTTTGCAC        | AGCAGTAGAA        |
| 30721 | AGAAATCTCA        | ACTGTAATAG         | GAAGCTTGGG        | ATGCATATGA        | GGAAGAAAGG        | CAAGAATGAA        |
| 30781 | CCACAAATTA        | TTCTTAGGGA         | AGATAAAAAAT       | TGCAGTCATG        | GGGAGACCTC        | TGGCTGAGAG        |
| 30841 | GGCCGTGATT        | ATTTCTGACA         | GAGGGATTAT        | GGAGTAGAAT        | ATGATGGCTT        | GGACCTTTTT        |
| 30901 | TCACTAAAAC        | AAGTCAGTCT         | TCTCAAAGGT        | AGTTTAGCTT        | TTCATATATC        | TTTCTCAGTT        |
| 30961 | TCTTCCATTC        | CCATTTCTCG         | CCATTTTCCT        | TTCTCTAACT        | TTTATTTATT        | ATATTTTTTC        |
| 31021 | CTAAAAGTTT        | AAATTTTCTA         | TATCTTTATC        | CCTTCAGAAG        | CCATCCCTAG        | TCACAGGACT        |
| 31081 | AGTTTTATTT        | CCCATTATGT         | AATGCTTCTT        | TCTCTGTCTG        | TTGACTTCTA        | TTTAGAACCA        |
| 31141 | GTGCACTAAA        | TCTGCCTCTA         | GGAACATACC        | TCTGCTAGGT        | TGCAAGAAAT        | ATCCCATTC         |
| 31201 | CCACTCACTC        | TGTGAAGACT         | CAATGCTTCT        | CAATATTCCT        | TACCTCCTGA        | GAGGGACTTG        |
| 31261 | CCTCACTTCT        | TTAATCCAAG         | GGACTCGATT        | TTTGCCAAAA        | CTAAGTCAGG        | AAAACCTACA        |
| 31321 | TAAGACATAG        | GAAAGACTTG         | CTGTGCTTCT        | TAAACCCAC         | TGTTTGTTTT        | CCTAATTGTG        |
| 31381 | AACAGTATTT        | TTAAAGTTCA         | AAGAGCTTCT        | AAGGCACTTG        | AGGGGAGATC        | TGATTTATTT        |
| 31441 | CCCAGTAATT        | ATTTTATTCC         | TTTCAGAAAA        | TTCCAATGAA        | TAAGATGGTT        | TTAATGATGT        |
| 31501 | GGGACTAATT        | TTTGTGTCTA         | AATCTCTTCC        | TATTTCTGGA        | TGAAAAAAG         | <b>GAGACCACTC</b> |
|       |                   |                    |                   |                   |                   | <b>Exon 16</b>    |
| 31561 | <b>TGAAGTACAA</b> | <b>TGA</b> AAAGGAA | AATGGGAATT        | ATAACCTGGT        | GAGGTGAGTA        | AAAAGAATTT        |
| 31621 | ATTCATCATT        | GCTGAAAACA         | GGTACATTCC        | TTTTGAAAGT        | TGGGAACTCC        | TCTGGTATTA        |
| 31681 | GAAAAAATAA        | AAAGAACGTA         | TATACACATA        | TATTTCCATG        | TCTATGTTTA        | TGTTTGTA          |
| 31741 | TCCATATTCA        | GAATATGCAA         | CAACTTTTTA        | TAACATGAC         | TTCAGTCCAT        | CTTTTAGTTA        |
| 31801 | CATATATATT        | CTAAACAACA         | ACTATTGCTA        | AGAGAAGCTG        | GGTAAGTAAA        | TGTGAATAAA        |
| 31861 | TCTTCTAAAG        | ATATTACAGG         | AAGTTCCTGC        | TGCGGCTCAG        | TGGGTTAAGG        | ACTTGATGTC        |
| 31921 | TTTGTGAAGA        | TGAGGGCTCG         | AGCCCTGGCC        | TCACTCAGTG        | AGTTAAGGAT        | CTAGCATTGC        |
| 31981 | TGTAAGCTGC        | AGCGTAGGTT         | GCAGATGGGG        | CTCAGATCCA        | GTGTTGCTGT        | GGCTGTGGCC        |
| 32041 | TCAGTTGCAG        | CTCTGATTCA         | ACCCTTAGGC        | GAGGAACTTC        | CATATGCAGC        | AAATGTGGCC        |
| 32101 | ATTAAAAATA        | AACAAAAAAC         | ATTATAGGAG        | TCATTTTATA        | AAAGAGATAA        | GACGTTTCTA        |
| 32161 | TAGTTATATA        | GTGCATACTC         | TGGTAAAGAT        | AGTATAGGAT        | ACTATAGGAA        | TATAGAAAGC        |
| 32221 | TTGCCTATGA        | AAATTTGGGA         | AGATTGTGGA        | AAAGACATCT        | CAAAATATGG        | CATAGAAAAG        |
| 32281 | AATCATATCT        | TTGAGGAACA         | GTAAGTTTTT        | CATTCAAAAC        | CGTGTATTGA        | ACATACTTAT        |



|       |            |             |            |            |            |            |
|-------|------------|-------------|------------|------------|------------|------------|
| 32341 | GGTGACAAAT | GGTGTCTTGA  | GTAATAAAAA | TTCAGTGATA | AAAGATGCTC | TTGACAAAGA |
| 32401 | CATGGCTGTT | GAATAGAAGG  | TCTCACTGTC | AATGTGTGGG | AATTATGGAC | AGCCTATGTG |
| 32461 | GACACAGGGA | ATAGATGAGA  | CTCTAGGCTG | GAAGGCTGCA | TTGAGCCCAG | TAATGAATGG |
| 32521 | TCCTGTCTGA | TATATTTTCAT | GCTCATATTT | TATTTTAGGG | ACTATTGGGG | AGGTGGTGGG |
| 32581 | CTTTGGAAGA | TTAAGCTGAG  | GCAAGACACA | ATCAGATTGC | CTTTTATAAT | TTACTTTCAG |
| 32641 | GAGGAAAATC | TAATAAAGA   | AAAAAAGTGA | ATAAGGCAAG | AAACATAAGT | TATACATCAA |
| 32701 | AAAGAAAAGG | TAGTGGAGTT  | CCTGTTGTGG | CTCAGTGGTT | AATGAACCCT | GCTAGGAACC |
| 32761 | ATGAGGTTGT | GGGTTTCGATC | CCTGGCCTTG | CTCAGTGGGT | TAAGGATCCA | GCGATGCCAT |
| 32821 | GAGTTGTGGT | GTAGGTCGCA  | GACCGTGGCT | TGGGTCCCGC | ATTGCTGTGG | CTATGGTGT  |
| 32881 | GGCTGGCAGC | TGCAGACAGC  | TCTGATTA   |            |            |            |
